# Supplementary material for: High-Performance Wearable Bi2Te3-Based Thermoelectric Generator
Source: Preprints.org preprint supplement (doi:10.20944/preprints202304.0967.v1), 2023-04-26
Supplement: Supplementary file 3 [file supplementary]

Supporting Information for:

**High-performance wearable Bi2Te3-based thermoelectric generator**

Yubing Xing1, Kechen Tang1, Jiang Wang1, Kai Hu1, Yani Xiao1, Jianan Lyu1,2, Junhao Li1, Yutian Liu1, Peng Zhou3, Yonggao Yan1*, Dongwang Yang1*

*1State Key Laboratory of Advanced Technology for Materials Synthesis and Processing, Wuhan University of Technology, Wuhan 430070, China*

*2Nanostructure Research Center, Wuhan University of Technology, Wuhan 430070, China*

3*Research Center for Materials Genome Engineering, Wuhan University of Technology, Wuhan 430070, China*

* Correspondence and requests for materials should be addressed to Yonggao Yan ([yanyonggao@whut.edu.cn](mailto:yanyonggao@whut.edu.cn)) or to Dongwang Yang (ydongwang@whut.edu.cn).

**
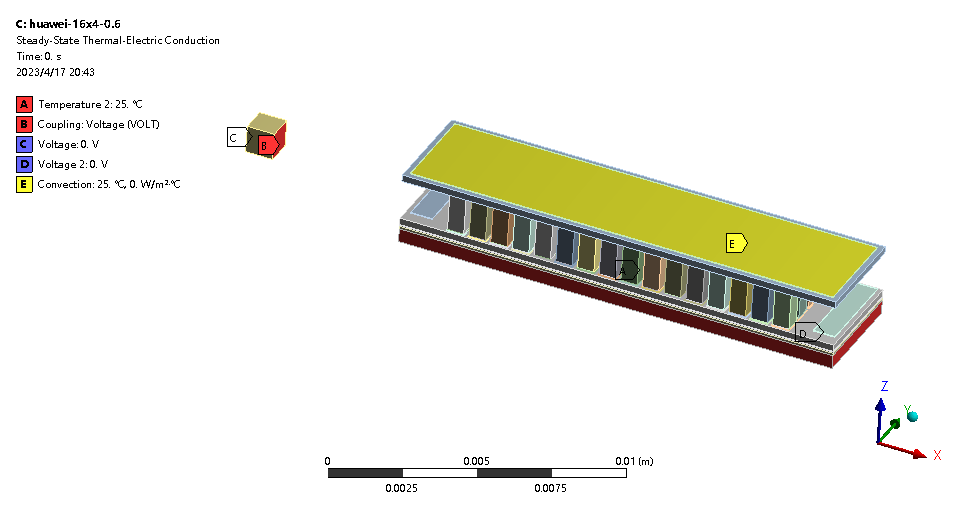
Figure S1.** Finite element model of w-TEG.

**Table S1.** Thermoelectric material properties in the temperature range 303 to 333K.

| Materials | Parameters | Value |
| --- | --- | --- |
| p-type Bi0.5Sb1.5Te3 | Electrical conductivity  (104 S m-1)  Thermal conductivity  (W m-1 K-1)  Seebeck coefficient  (μV K-1) | 8.19~9.76  1.53~1.58  223~231 |
| n-type Bi2Te2.7Se0.3 | Electrical conductivity  (104 S m-1)  Thermal conductivity  (W m-1 K-1)  Seebeck coefficient  (μV K-1) | 9.91~11.1  1.76~1.81  -214~-212 |

**Table S2.** Material properties used in the simulation.

| Materials | Thermal conductivity  (W m-1 K-1) | Electrical resistivity  (ohm·m) |
| --- | --- | --- |
| AlN | 195~270 | -- |
| Cu | 401 | 1.55×10-8~2.78×10-8 |
| Solder  Skin | 55  11.8~14.2 | 1.14×10-7  -- |
| Ag | 420 | -- |

**
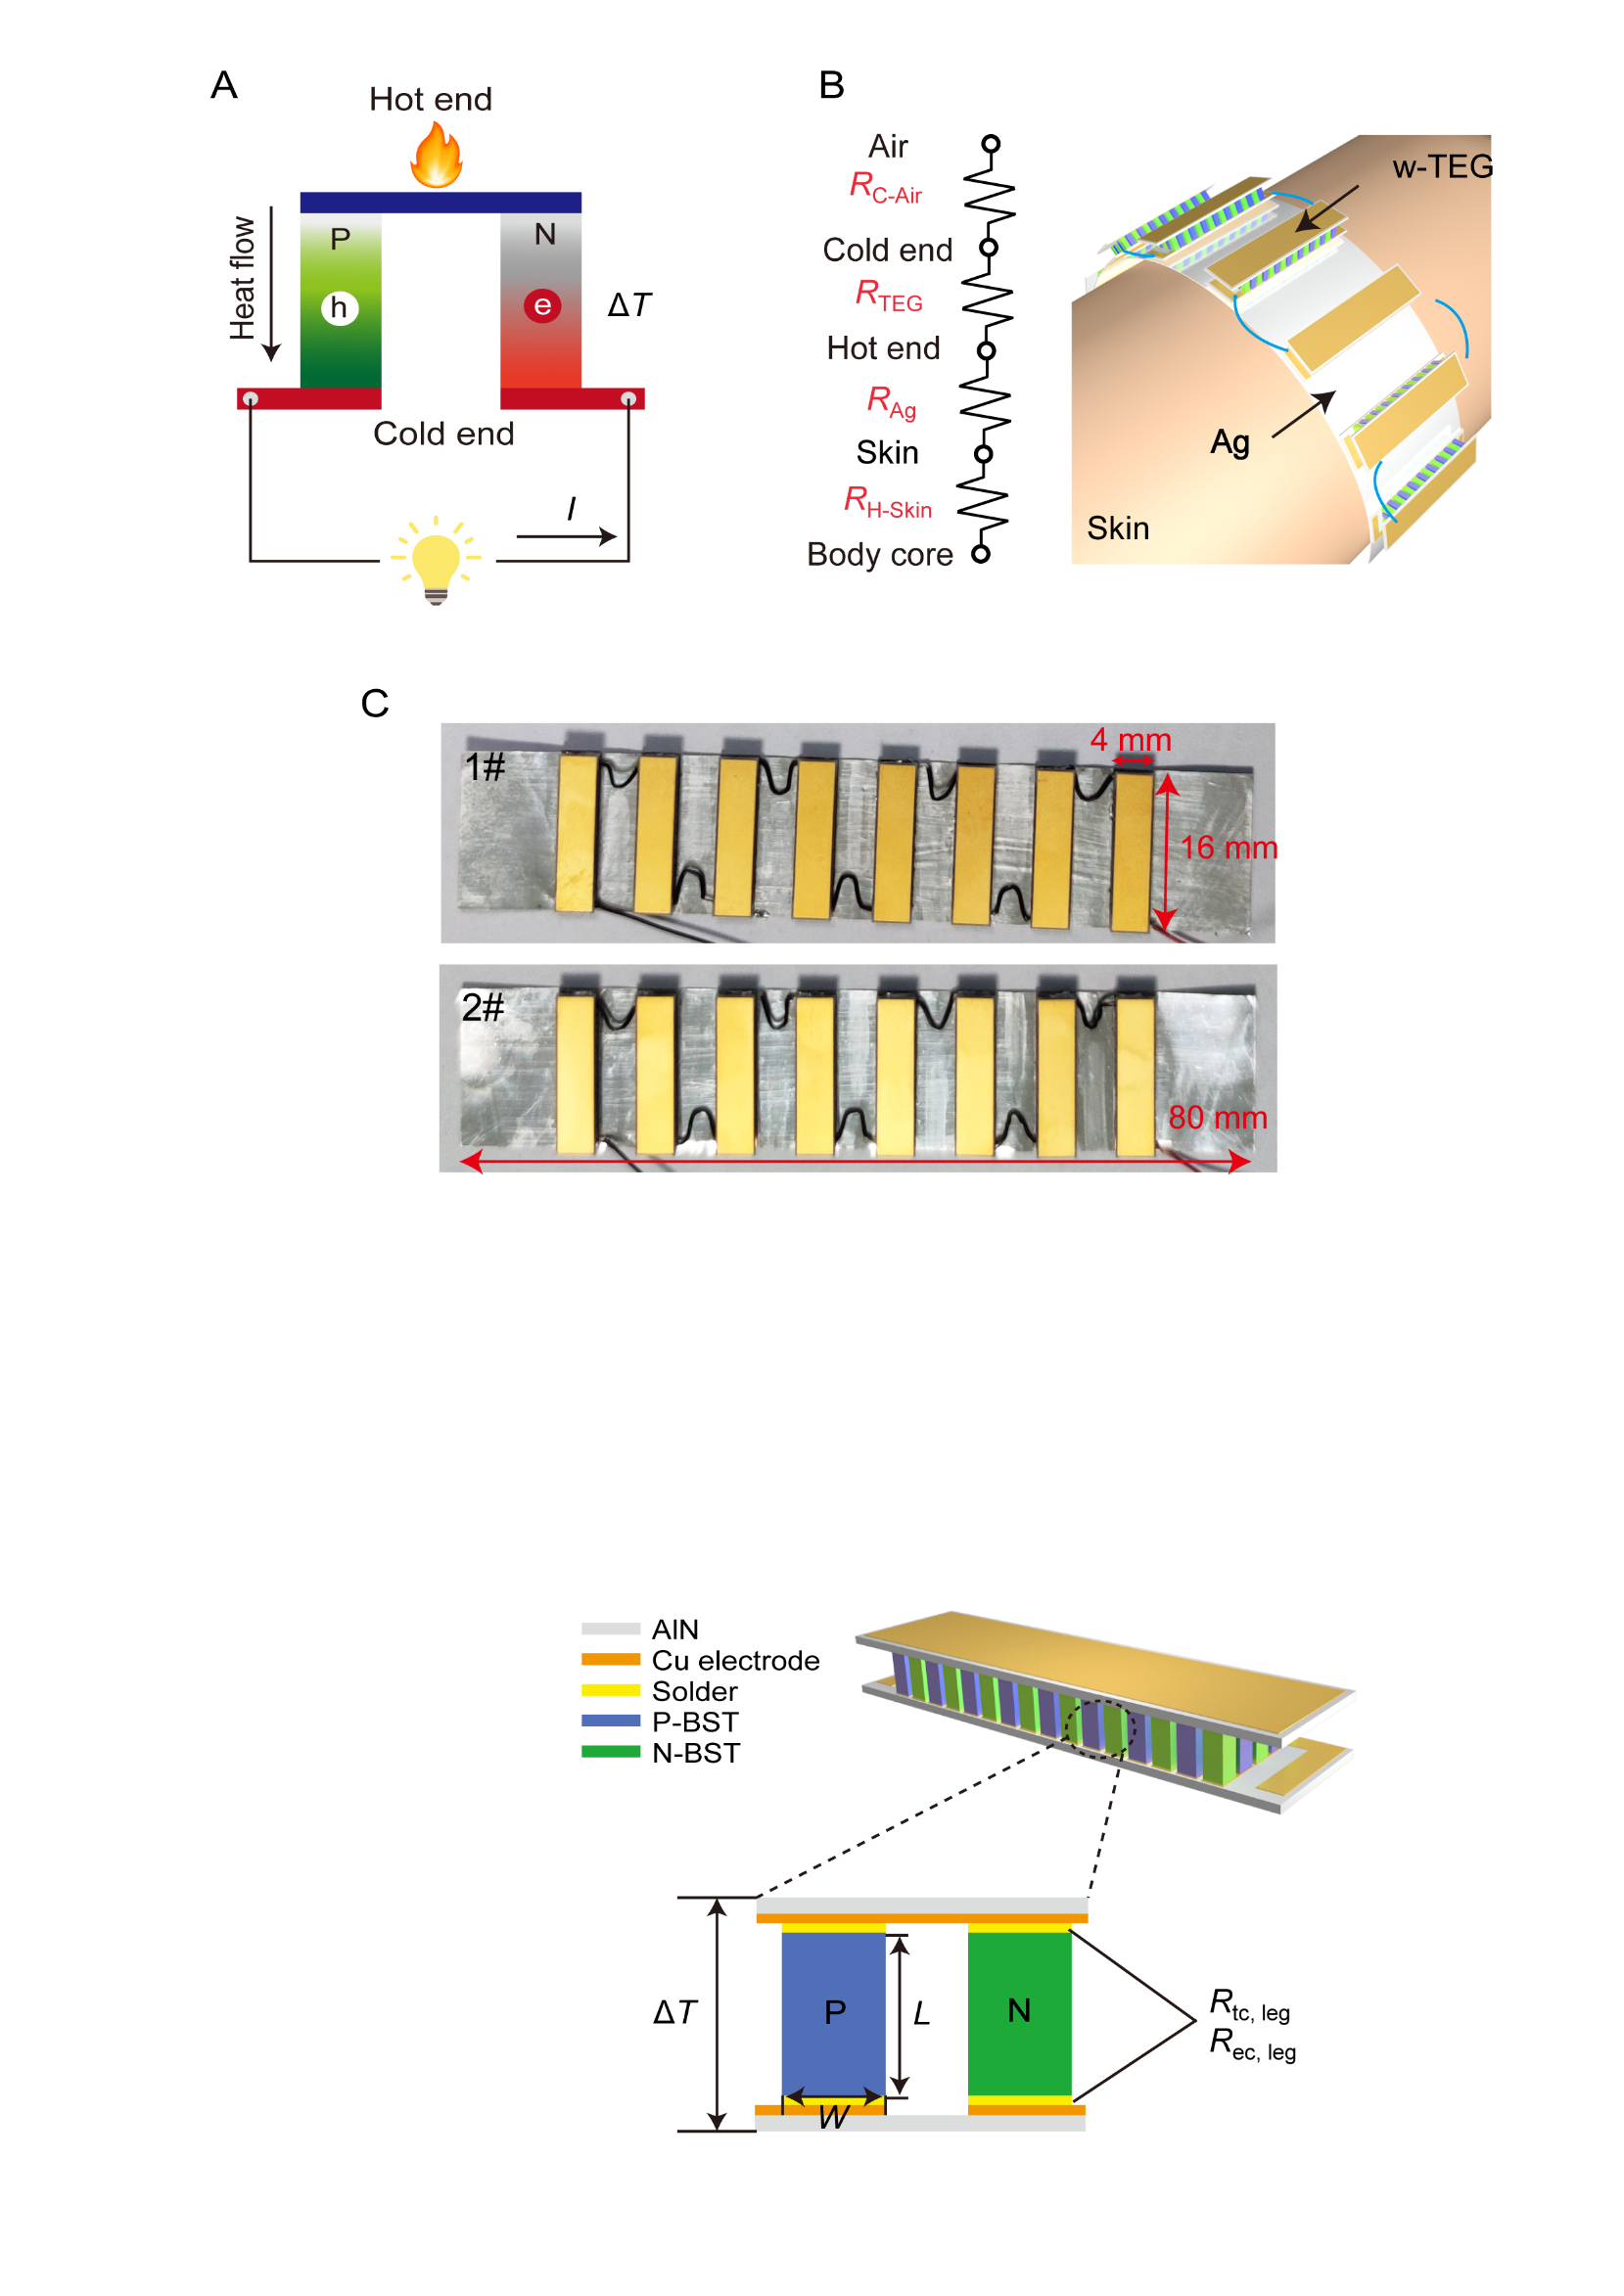
**

**Figure S2.** TEGunit and its internal structure.


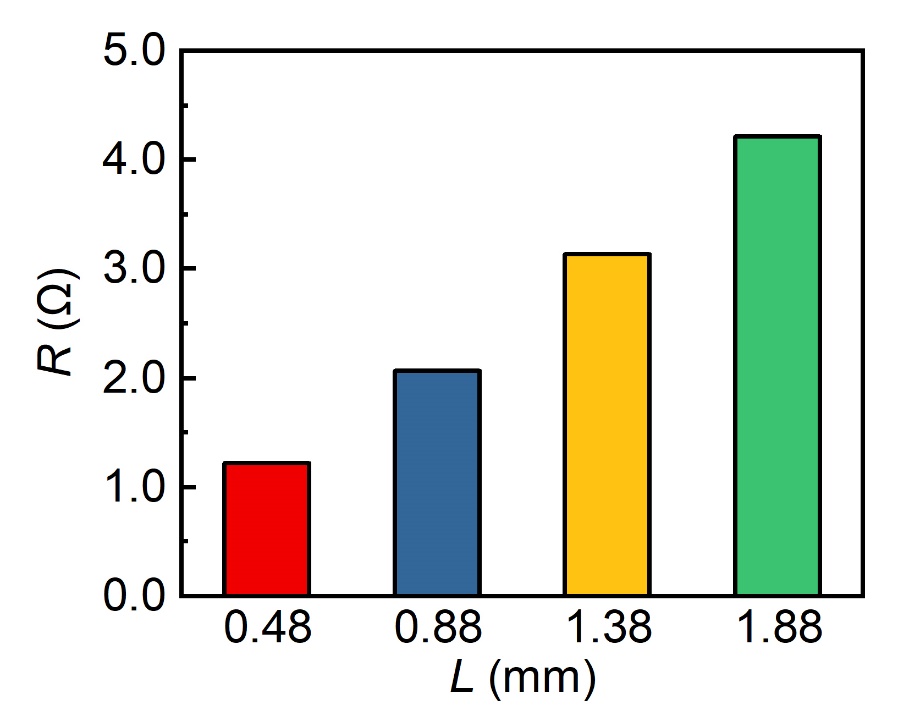


**Figure S3.** Resistance of TEG with different thermoelectric leg lengths.
